1

## 2 **SARS-CoV-2 Testing Strategies for Outbreak Mitigation**

### 3 **in Vaccinated Populations**

4 Chirag K. Kumar<sup>1</sup>, Ruchita Balasubramanian<sup>2</sup>, Stefano Ongarello<sup>3</sup>, Sergio Carmona<sup>3, 4</sup>, and

5 Ramanan Laxminarayan<sup>1, 2, \*</sup>

6<sup>1</sup> Princeton University, Princeton NJ, USA

7<sup>2</sup> Center for Disease Dynamics, Economics & Policy, New Delhi, India

8<sup>3</sup> Foundation for Innovative New Diagnostics, Geneva, Switzerland

9<sup>4</sup> University of Witwatersrand, Johannesburg, South Africa

10\* Corresponding author: [ramanan@cddep.org](mailto:ramanan@cddep.org)

11

## 12Abstract

13 Although COVID-19 vaccines are globally available, waning immunity and emerging  
14vaccine-evasive variants of concern have hindered the international response as COVID-19 cases  
15continue to rise. Mitigating COVID-19 requires testing to identify and isolate infectious  
16individuals. We developed a stochastic compartmentalized model to simulate SARS-CoV-2  
17spread in the United States and India using Reverse Transcriptase Polymerase Chain Reaction  
18(RT-PCR) assays, rapid antigen tests, and vaccinations. We detail the optimal testing frequency  
19and coverage in the US and India to mitigate an emerging outbreak even in a vaccinated  
20population: overall, maximizing frequency is more important, but high coverage remains  
21necessary when there is sustained transmission. We show that a resource-limited vaccination  
22strategy still requires high-frequency testing and is 16.50% more effective in India than the  
23United States. Tailoring testing strategies to transmission settings can help effectively reduce  
24cases more than if a uniform approach is employed without regard to differences in location.

25 **Key Words and Phrases:** COVID-19, SARS-CoV-2, individual-based modeling, agent-  
26based modeling, vaccines, LMICs.

## 27 1. INTRODUCTION

28 Since the emergence of severe acute respiratory syndrome coronavirus 2 (SARS-CoV-2) in  
29 Wuhan, China in late 2019, the coronavirus disease (COVID-19) pandemic has resulted in more  
30 than 280 million reported cases and 5.4 million reported deaths worldwide as of January 1,  
31 2022<sup>1</sup>. Despite efforts to curb the spread of SARS-CoV-2 through restrictions on travel<sup>2</sup>,  
32 business openings<sup>3</sup>, and personal measures<sup>4</sup>—including mask wearing and social distancing—  
33 cases have continued to rise in many countries<sup>5</sup>. Although vaccines against COVID-19 are  
34 available, the emergence of variants of concern<sup>6</sup> that are only partially neutralized by existing  
35 antibodies or prior vaccination<sup>7</sup> and are more contagious along with waning immunity<sup>8</sup> has  
36 resulted in widespread COVID-19 outbreaks even in highly vaccinated populations<sup>9</sup>. Likewise,  
37 many populations, particularly in low- and middle-income countries, still lack widespread access  
38 to vaccines and continue to experience significant excess mortality<sup>10</sup>. All these factors must be  
39 simultaneously considered when developing mitigation strategies for emerging outbreaks.  
40 Consequently, it appears likely that SARS-CoV-2 will continue to pose a threat to public health  
41 for many years even if vaccines are distributed widely because of the rapid evolution of variants  
42 of concern. Thus, testing and containment will continue to be critical to COVID-19 response and  
43 mitigation.

44 Because of the high transmission rate of SARS-CoV-2 and prevalence of asymptomatic  
45 carriers<sup>11</sup>, accurate, efficient, and pervasive testing methods are needed to track and contain  
46 disease spread. Currently, two main diagnostic methods are widely used<sup>12</sup>. *Reverse Transcriptase*  
47 *Polymerase Chain Reaction* (RT-PCR), which is considered to be the gold standard, detects the  
48 presence of viral RNA in respiratory samples<sup>13</sup>. Although highly sensitive, test results typically  
49 require two to three days<sup>14</sup>, during which an infected individual may continue transmitting the

50virus. *Later flow rapid antigen tests* can be read in less than an hour<sup>15</sup>, and an individual who  
51tests positive can immediately self-isolate. However, rapid antigen tests require a higher viral  
52load for positive detection, must be tailored to the antigens on a specific variant, and may not  
53return a positive result for infectious individuals past the early stages of their infection<sup>16</sup>.

54 Testing is only effective when individuals who test positive are quarantined, so they will not  
55continue to transmit the disease further; essentially, testing and subsequent quarantining  
56minimizes the effective duration during which an individual may spread the disease. However,  
57testing usually only occurs in a reactionary fashion: for instance, an individual exhibits symptom  
58that may be attributed to COVID-19 and the individual is tested, an individual comes in close  
59contact with an infected person, or an individual seeks to travel and must show proof of a  
60negative test. This type of testing is not optimized towards minimizing cases but rather just  
61identifies current cases. Comparatively, proactive testing where testing is required within a  
62community—such as with a college campus, business, or factory—is far more likely to be effective  
63as it is more likely to capture asymptomatic spreaders.

64 Although both RT-PCR and antigen tests could play a role in COVID-19 containment, there  
65is lack of clarity on the optimal coverage and frequency with which these tests should be used,  
66and how they may be combined to greatest effect. Moreover, while COVID-19 has affected  
67populations around the world regardless of socioeconomic status<sup>17</sup>, there are significant  
68differences in transmission intensity by setting<sup>18</sup>. Tailored testing strategies that are specific to  
69the local transmission context may be superior to applying a one-size-fits all method for all  
70populations. Guidance on testing strategies may differ by transmission setting (i.e., in high-  
71income countries, such as the United States, versus low- and middle-income countries, such as  
72India) as not only do transmission dynamics differ<sup>18</sup> but low- and middle-income countries

73(LMICs) now have the majority of confirmed COVID-19 cases<sup>1</sup> along with more barriers to  
74adequate health care<sup>19</sup>. Significant effort has been directed at containment strategies across high  
75income countries in Europe and North America<sup>20–24</sup>, but these findings cannot be generalized to  
76all countries worldwide<sup>25</sup> because of differences in transmission intensity. Moreover, for  
77COVID-19 to become globally endemic, it must be controlled in all countries, so determining  
78setting-specific mitigation strategies and characterizing how vaccines and testing may be used in  
79tandem is critical to international public health efforts to move towards the post-pandemic phase.

80 Here, we used a stochastic, compartmentalized, agent-based model (ABM) to simulate  
81COVID-19 transmission dynamics in the United States and India under different proactive  
82testing scenarios and vaccination potentials. We evaluated various strategies for COVID-19  
83control in both countries to identify their efficacy and costs and determine how testing  
84recommendations may differ by transmission setting for mitigating an outbreak even in highly-  
85vaccinated populations. Our simulation results can be directly applied to community settings,  
86such as office buildings, factories, or campuses, that are trying to reopen safely and with minimal  
87disease spread.

## 88 **2. RESULTS**

89 Before evaluating the effect of our testing scenarios, we ran our model without any  
90mitigation (Fig. S1; Table S1) to validate our ability to recreate observed COVID-19  
91characteristics. The model-estimated case-fatality ratio (CFR) for the United States is 2.66%  
92[95% percentile credible interval from 200 independent realizations of the ABM 2.17–3.12%],  
93and the actual CFR at time of writing is 3.05%<sup>26</sup>; likewise, the model-estimated CFR for India is  
941.85% [1.47–2.25%] and the actual CFR based on available data is 2.11%<sup>18</sup>. Since our model

95recreated the expected dynamics, we could justify the use of this model to identify the efficacy  
96and trade-offs of testing strategies and vaccinations in both settings.

### 97 *Proactive Testing to Mitigate an Emerging Outbreak*

98 The B.1.1.529 SARS-CoV-2 variant (designated “Omicron” by the World Health  
99Organization) has shown almost complete evasion to existing vaccines or immunity from prior  
100infection. Based on Omicron’s observed infectivity even in highly vaccinated populations, we  
101modeled the impact of RT-PCR or antigen testing on a representative population in the US (Fig.  
1021) or India (Fig. 2) by proactively testing at various frequencies (quantified as days between  
103tests) and coverages (quantified as the fraction of people surveilled each time testing is done).  
104While the cost of the surveillance depended only on the rate of testing (i.e., average number of  
105tests administered per day), the risk of infection depended on the frequency, coverage, type of  
106test used, and transmission setting, with each test and setting placing different importance on  
107frequency and coverage (Fig. S3).

108 Overall, for the same coverage and frequency of testing, using RT-PCR assays resulted in  
10912.65% [7.01% – 18.30%] more cases than antigen tests in the US and 9.30% [4.75% – 13.85%]  
110more cases in India (Figs. 1-2), likely because RT-PCR tests require a two-to-three-day  
111turnaround time during which infected individuals may continue transmitting (Fig. S2). Rapid  
112antigen tests are also up to 20 times cheaper, allowing for further screening than RT-PCR assays  
113with the same financial budget (Fig. 2). Ultimately, when used frequently and widely, antigen  
114tests were notably better than RT-PCR assays (Fig. S3, S4, S5). Nevertheless, at low coverage  
115and frequency, neither test was effective at mitigation.

116 Explanatory regression models that predicted the percent infected for each setting from  
117frequency, coverage, and test used ( $R^2$  of all models  $>90\%$ ; Table S2) indicated that use of

118antigen tests versus RT-PCR tests resulted in 3.12% [95% confidence interval on the regression  
119coefficients 1.73–4.51] fewer cases in the United States and 1.99% [95% CI 1.02–2.97] fewer  
120cases in India. Independent of test, maximizing frequency had a larger effect on mitigating cases  
121than maximizing coverage, with a 3.71-fold [2.99–4.43] greater effect in the United States and a  
1225.01-fold [4.15–5.87] greater effect in India. In other words, given resource constraints, the  
123frequency of testing (i.e., the inverse of the number of days between subsequent test  
124administrations) should be 3.71 and 5.01 times greater than the coverage (i.e., the number of  
125testing administrations required to surveil the whole population) in the United States and India,  
126respectively. Though frequency dominates overall, the importance of coverage differed by test.  
127When RT-PCR tests were used rather than antigen tests, maximizing coverage has a 14.24%  
128[10.71–17.76] greater effect on reducing cumulative infections in the United States and a 6.84%  
129[4.89–8.79] greater effect in India. Nevertheless, use of antigen tests was more effective than use  
130of RT-PCR tests, especially when used frequently.

131 While we observe the same general trends in both settings, frequency is more important in  
132India than in the United States: Figs. 1 and 2 show a strong gradient of increasing cases as testing  
133frequency is decreased, most noticeably for antigen testing and especially for India. However, we  
134observe that at low coverage, the effect of frequency is much less in India. High-frequency, low-  
135coverage testing can still be useful in the United States, but we did not observe the same pattern  
136in India, where coverage must be relatively high for effective mitigation. Although increasing  
137coverage when it was low had little benefit, increasing coverage from half of the population  
138surveilled to the whole population surveilled had a larger effect in India. Ultimately, though  
139frequency may still have dominated overall, increasing coverage was also critical in certain  
140testing scenarios in India. Additionally, we conducted sensitivity analyses by running canonical

141 strategies with  $R_{\text{eff}}$  from 2.5 (used in all main figures and analyses; Fig. S6, Fig. S7) and  
142 decreasing  $R_{\text{eff}}$  to  $R_{\text{eff}} = 2$  (Fig. S8) and 1.5 (Fig. S9). Our main findings and trends still held  
143 across all values of  $R_{\text{eff}}$ , though there are fewer cases with a lower  $R_{\text{eff}}$ .

#### 144 *Utilizing Combinations of Tests and Vaccines*

145 Emerging variants of concern are not only vaccine-evasive but often more transmissible. To  
146 identify and isolate transmissible individuals as quickly as possible, we propose a mixed strategy  
147 that utilizes the complementary nature of antigen tests and RT-PCR assays (i.e., antigen tests  
148 excel when used frequently whereas RT-PCR assays are more effective when used widely). All  
149 individuals were tested weekly using antigen tests and all negative results were followed up  
150 immediately by an RT-PCR assay (Fig. 3). Since RT-PCR assays have higher sensitivity, their  
151 use as a follow-up should allow for the detection of individuals with a viral load too low to be  
152 detected by an antigen test. Nevertheless, this was resource intensive: it potentially required  
153 more than just one test per individual.

154 Such a mixed strategy was effective in both settings—resulting in minimal hospitalizations  
155 and deaths—but more effective in reducing cases India than in the United States. Compared with  
156 weekly antigen testing (Fig. S7), this approach did not significantly reduce cases in the United  
157 States ( $\lambda = 2.25$ ,  $p = 0.13$ ) or India ( $\lambda = 1.00$ ,  $p = 0.32$ ). Nevertheless, this strategy resulted in  
158 reaching 1% incidence 7.0 [0.0–14.0] ( $\lambda = 9.25$ ,  $p < 0.005$ ) days earlier in the United States and  
159 7.0 [–7.0–7.0] days earlier ( $\lambda = 5.81$ ,  $p = 0.016$ ) in India. In practice, effective mitigation of  
160 SARS-CoV-2 or conferring immunity through vaccination or booster shots can allow testing to  
161 slow down and be less extensive, decreasing the required cost of testing. However, testing should  
162 only stop after SARS-CoV-2 infections have dropped below a level where they are no longer  
163 able to trigger widespread transmission or enough individuals are vaccinated (such external



164factors are not considered in our simulations as they are highly variable and differ between  
165transmission setting). Nevertheless, we show that effective surveillance is critical especially in  
166the early stages of transmission to mitigate disease burden from contagious variants of concern.

167 Likewise, the rapid emergence of variants of concern has placed an emphasis on widespread  
168vaccination campaigns and now even booster shots for some populations. Nevertheless, key  
169questions remain about optimal testing strategies and epidemic trajectories for populations as  
170vaccines are administered or additional immunity is conferred through booster shots. Thus, we  
171determined how proactive testing and simple vaccination strategies can be used together to  
172promote SARS-CoV-2 reaching the endemic phase. Disease surveillance, continued testing, and  
173vigilance remain critical even as more individuals become vaccinated. Note that while there are  
174studies detailing optimal vaccine allocation strategies<sup>27</sup>, our goal is not optimize the distribution  
175of vaccines but rather determine the impact of vaccines in a resource-limited distribution scheme  
176and how vaccines must be coupled with testing to mitigate disease spread. We couple daily  
177vaccinations with antigen testing 100% of the population weekly and antigen testing 33.3% of  
178the population weekly (i.e., see Fig. S7 for these scenarios but without vaccines) in both settings.

179 Overall, vaccines are mostly effective in reducing COVID-19 cases at both coverages and  
180in both transmission settings. First, compared to there being no vaccinations or immunity, 20%  
181vaccines coupled with weekly antigen testing 100% of the population resulted in 15.12% [6.39 –  
18225.50] ( $\lambda = 396.01$ ,  $p < 10^{-6}$ ) fewer cases in India than without vaccines. However, surprisingly,  
183the limited distributions of vaccines only reduced cases marginally in the US compared to  
184weekly antigen testing alone ( $\lambda = 1.69$ ,  $p = 0.19$ ). Secondly, we observe that the increasing  
185number of vaccinations resulted in a mitigated disease course; concretely, we observed that  
186vaccines coupled with weekly antigen testing 100% of the population resulted in infections

187below 0.5% incidence 7.0 [0 - 15.0] ( $\lambda = 45.00, p < 10^{-6}$ ) days faster in the US and 70.0 [34.83 –  
188126.0] ( $\lambda = 372.49, p < 10^{-6}$ ) days faster in India than the same testing strategy but with no  
189vaccines. However, widespread testing is still critical, especially in early phases of vaccine  
190distribution where we note many antigen-positive SARS-CoV-2 cases being captured. We also  
191found marked differences between testing 100% of population weekly or 33.3% of the  
192population weekly: specifically, testing 100% of the population weekly resulted in 30.83%  
193[20.41 – 33.10] ( $\lambda = 342.25, p < 10^{-6}$ ) fewer cases in the US and 12.99% [7.65 –18.58] ( $\lambda =$   
194396.01,  $p < 10^{-6}$ ) fewer cases in India than testing 33.3% of the population weekly, suggesting  
195high frequency testing remains critical even with vaccines.

196        Nevertheless, while vaccines are effective in both transmission settings, there are key  
197differences in the corresponding disease courses and number of infections by transmission  
198setting. In particular, as discussed above, cases peak earlier in the US than in India, and as a  
199result of distributing vaccines while there is still transmission in India, there were 16.50% [3.83 –  
20033.17] ( $\lambda = 396.01, p < 10^{-6}$ ) fewer cases in India than the US for antigen testing 100% of the  
201population weekly. Furthermore, we also noted that using vaccines reduced the cost of testing  
202because vaccinated individuals are not tested. Ultimately, the use of vaccines is effective in  
203minimizing cases when coupled with testing and can be a tailored strategy to mitigate ongoing  
204outbreaks.

## 205    **4. DISCUSSION**

### 206 *Maximizing the Effectiveness of Testing Strategies*

207        Our results provide insight into constructing testing strategies with maximum effectiveness.  
208First, antigen tests are more effective than RT-PCR tests across both transmission settings

209 because they enable faster action to reduce transmission; our results agree with real-world  
210 evidence that antigen tests have been used successfully in nation-wide testing campaigns<sup>28,29</sup>. We  
211 observe that RT-PCR assays are more comparable to antigen tests as their turnaround time is  
212 decreased<sup>30</sup> (Fig. S2). Nevertheless, the increased mitigation of antigen tests compared with RT-  
213 PCR assays with standard turnaround times is most pronounced when 100% of the population is  
214 tested weekly. Since antigen tests have a quicker turnaround time, infected individuals are more  
215 likely to self-isolate faster. Our simulations show that use of antigen tests results in a lower peak  
216 of daily cases compared with RT-PCR assays. Because disease spread is greatest in the early  
217 stages, when most of the population is still susceptible, early isolation of infected individuals is  
218 critical to mitigating disease spread<sup>31</sup>, especially critical when considering highly contagious and  
219 vaccine-evasive variants of concern. Additionally, SARS-CoV-2 transmission to secondary  
220 individuals is significant even immediately after initial infection<sup>32</sup> (Fig. S9), further underscoring  
221 the need for isolating infectious individuals quickly.

222 We show that that high-frequency testing must be prioritized when fighting an emerging  
223 outbreak driven by a contagious variant of concern, though the relative importance of frequency  
224 versus coverage differs by setting and the type of test used. Maximizing frequency has the  
225 greatest importance for antigen testing. This is likely driven by its lower sensitivity but quicker  
226 turnaround: since antigen tests are unable to detect infected individuals with low viral loads, they  
227 must be used frequently to identify when individuals become infectious past detectable levels  
228 and force them to isolation. On the other hand, RT-PCR assays can still be effective when used  
229 widely because they can identify infectious individuals with low viral loads. Moreover, frequent  
230 use of antigen tests is not substantially better than even more extensive disease mitigation

231 strategies, such as coupling antigen and RT-PCR tests, and is still effective in scenarios where  
232 there may even be unmitigated disease spreaders.

### 233 *Comparison of Testing Effectiveness between the United States and India*

234 Although we observe mostly similar trends in mitigation strategies between the two  
235 countries, some differences are important for tailoring mitigation solutions. First, while both  
236 transmission settings have the same  $R_{\text{eff}}$  and are parametrized with the same incubation period  
237 and transmission distribution, the disease trajectory is markedly different. Overall, transmission  
238 is shorter, reaches a higher peak in percentage infected, peaks earlier, and the credible intervals  
239 are substantially larger in the United States than India—all of which can be explained by the  
240 contact matrices and the inherent variability in contact patterns<sup>18</sup>; moreover, our findings  
241 generally agree with real world analyses of SARS-CoV-2 spread in the US<sup>33,34</sup>. Notably, the  
242 large credible intervals in the United States are likely driven by the high variability in the  
243 distribution of infected secondary contacts<sup>35</sup>. Moreover, these differences affect mitigation  
244 effectiveness. We note that sustained transmission in India, which our simulation predicts, is  
245 similar to what is actually occurring in India and contributing to observed resurgences of cases<sup>36</sup>.

246 While our simulations overall indicate that high-frequency testing must be an urgent  
247 priority, we also find that the importance of frequency and coverage differs by transmission  
248 setting. Whereas increasing frequency is overall more important in India, increasing coverage  
249 beyond half of the population surveilled at each testing occurrence is critical for markedly  
250 improved mitigation and for the benefits of frequency to be most noticeable. Notably, at lower  
251 coverages, increasing frequency is more beneficial than increasing coverage. Consequently, we  
252 suggest that with limited resources, frequency should be prioritized unless coverage can be  
253 increased beyond half of the population surveilled; likewise, at those high coverages, the

254 importance of frequency is most evident. Ultimately, the need for widespread and frequent  
255 antigen testing is urgent in both countries, but the trade-off between frequency and coverage  
256 should be tailored to community needs.

257 Moreover, we find antigen testing is not only more effective but also substantially cheaper  
258 than use of RT-PCR assays. Our simulations show that given a constant budget constraint,  
259 antigen testing can be done more frequently or at wider coverage and result in fewer cases than  
260 use of RT-PCR assays. Nevertheless, we also observe that the same testing scenario may have  
261 different costs in the United States versus India. In our simulation, we assume that all individuals  
262 who have not been infected must be tested. Since in the United States the peak in cases occurs  
263 earlier, more individuals are infected in the early stages and thus a typical individual is removed  
264 from the testing pool faster than in India. Although the cost of testing thus should be lower in the  
265 United States and we do observe this in many of our simulations, in certain scenarios (e.g., where  
266 antigen tests are used at high frequency and coverage; Fig. 2), the cost is less in India because the  
267 testing strategy is less effective. Since in India more individuals are infected and do not need to  
268 be tested, the cost of the strategy falls. However, given the differential nature of disease spread,  
269 testing frequency and coverage can change as the epidemic progresses, which may also change  
270 the cost (not considered in our simulations). Finally, we do not consider the cost of hospital beds  
271 or self-isolation, which likely differ heavily between settings. Additionally, our analysis does not  
272 explicitly consider contact tracing or self-isolation of individuals who experience symptoms, so  
273 our results more directly indicate the impact of proactive testing and immediate quarantining.

274 Finally, we show that vaccines and testing can be combined to create mitigation strategies  
275 that mitigate the duration of sustained transmission and can usher in an endemic phase earlier.  
276 Even a resource-limited vaccine allocation strategy of simply distributing vaccines randomly to

277susceptible individuals in addition to testing some of the population weekly is effective in  
278minimizing cases and ending sustained transmission earlier in both transmission settings (Fig. 4).  
279However, we show that vaccinations have different impacts in each transmission setting. In  
280particular, the vaccination strategy utilized is more effective in reducing cases in India than the  
281US. This is likely due to the sustained nature of SARS-CoV-2 transmission observed naturally in  
282India (Fig. S1); consequently, the impact of continued vaccinations is greater in India as  
283supposed to the US where infections peak much earlier. Thus, our findings show that vaccines  
284are critical to minimizing the chance of future waves of COVID-19 cases especially as much of  
285the world's population still remains susceptible to SARS-CoV-2. Nevertheless, we note that  
286widespread testing is still critical, especially in the early phases of vaccine distribution when  
287vaccines are limited. Moreover, testing will likely continue to be critical as further variants of  
288concern that may be vaccine-resilient or even vaccine-resistant continue to emerge and must be  
289monitored to ensure that resurgences of SARS-CoV-2 infections do not occur<sup>37</sup>.

290 Generally, the most effective of the testing strategies discussed in this paper are frequently  
291not the most expensive but rather those that are most closely tailored to the dynamics of the  
292setting. Therefore, identifying transmission dynamics across a wide range of settings and  
293applying specialized testing scenarios to specific environments are critical to effective  
294mitigation. Our study suggests that contact matrices specific to the setting must be used as  
295opposed to generic contact matrices<sup>38</sup> commonly used in modeling studies. Our simulation shows  
296that social mixing patterns affect the efficacy of mitigation strategies. However, we acknowledge  
297that in developing tailored scenarios, considering social factors is also crucial, since health  
298behaviors have been shown to be related to social clustering<sup>39-41</sup>. Nevertheless, we believe the

299 trade-offs presented in this paper present a useful set of heuristics that can inform testing  
300 strategies and health policy across a wide range of settings.

## 301 **5. METHODS**

302 Accurately simulating SARS-CoV-2 dynamics requires two types of data: details of disease  
303 outcomes (i.e., data regarding COVID-19's effects in humans), and attributes of virus spread  
304 (i.e., properties of SARS-CoV-2 transmission). Details of disease outcomes include such effects  
305 as whether an infection will result in hospitalization. Attributes of virus spread refer to the  
306 disease's epidemiology, such as the  $R_{\text{eff}}$  and viral shedding by day. We gathered both kinds of  
307 data through freely and publicly available sources for both transmission settings.

### 308 *COVID-19 Characteristics*

309 We obtained data on COVID-19 cases and death counts from the beginning of data  
310 acquisition in the United States and India: US data were obtained from the National Center for  
311 Health Statistics (of the US Centers for Disease Control and Prevention, CDC)<sup>26</sup>, and data from  
312 India were obtained from previous studies<sup>18,42</sup>. We assign each individual an age, gender, and  
313 comorbidity based on census data and comorbidity prevalence<sup>43</sup>. We used these data to estimate  
314 COVID-19 probability of death given age, gender, and comorbidities. Additionally, the CDC  
315 keeps data on the probability of hospitalization and summary statistics (i.e., the 25<sup>th</sup>, 50<sup>th</sup>, and  
316 75<sup>th</sup> percentile) for time spent in the hospital due to severe COVID-19 infection<sup>44</sup>. Although  
317 having the distribution of hospital stay duration would be ideal, based on empirical evidence that  
318 such data follow a negative binomial distribution<sup>45</sup>, we construct negative binomial distributions  
319 with the same summary statistics to generate an estimated probability for various lengths of  
320 hospital stays. We had different hospitalization rates in the United States and India, but we

321 assume that the pattern of hospital stay length is maintained between the two countries, since  
322 there is a shortage of data on COVID-19 hospitalizations in India. Ultimately, drawing from  
323 empirical evidence of COVID-19 effects, we project the expected outcome of individuals'  
324 infection given their age, gender, and comorbidities, including whether they are hospitalized,  
325 time spent in hospital, and whether they die.

### 326 *SARS-CoV-2 Tests*

327 We considered two types of tests in our simulations: RT-PCR assays and antigen tests. The  
328 sensitivity and specificity as a function of viral load of each test are given in Table S3. From  
329 current data, we used a turnaround time of three days for RT-PCR assays<sup>14</sup>. We assumed antigen  
330 test results come back quickly enough that an infectious individual will not further spread the  
331 virus while waiting for results. Finally, drawing from current estimates of costs for these tests,  
332 we assumed a cost of each test (Table S3), but note that costs may change dramatically based on  
333 setting and health insurance coverage. All individuals who do not yet have a documented  
334 infection are tested. Likewise, based on current evidence, fully vaccinated individuals (i.e., either  
335 those with a two-dose regiment of an mRNA vaccine or a single dose of another WHO approved  
336 vaccine) experience a decreased probability of transmitting the disease, and further booster shots  
337 increase the chance that a vaccinated but infected individual will not transmit to their contacts.

### 338 *SARS-CoV-2 Epidemiology*

339 Although the above data determine the effects of COVID-19 for an individual, they do not  
340 detail how SARS-CoV-2 spreads in a population. Thus, to simulate SARS-CoV-2 transmission,  
341 we gathered data on the incubation period<sup>46</sup>, transmission probability since infection<sup>32</sup>, and  
342 inferred viral load after symptoms<sup>47</sup>. Together, these variables detailed the necessary information  
343 for SARS-CoV-2 transmission from an infected individual to secondary contacts by day and



344 whether the individual will be flagged as infectious by a test. Despite extensive data along with  
345 quantifiable uncertainty for the incubation period, transmission probability since infection, and  
346 viral load after symptom onset of SARS-CoV-2 (see Table S3 for the parameters used in our  
347 analysis), quantifying viral load prior to symptom onset is more difficult and there is sometimes  
348 contradictory evidence on the peak viral load<sup>48,49</sup>. Thus, we drew from previous viral kinetics  
349 models to infer the viral load prior to symptom onset; note that our results are likely robust to  
350 changes in viral load distribution as there is variability in our estimated viral loads by individual  
351 (Fig. S9). Specifically, we say that viral load peaks anywhere from day 0 to day 4 after symptom  
352 onset<sup>50</sup>; the peak is anywhere from 5 to 11 log<sub>10</sub> virions per mL<sup>47</sup>, that log<sub>10</sub> viral load increases  
353 linearly from negative infinity on the day of infection to the aforementioned peak, and that log<sub>10</sub>  
354 viral load decays from peak to the end of the individual's infection linearly with a slope drawn  
355 from meta-analyses<sup>47</sup>. See Fig. S9 for our inferred viral load distributions.

356 Additionally, we gathered data on contact matrices and the distribution for the number of  
357 secondary cases arising from an infected individual for each transmission setting<sup>18,51</sup>. These  
358 variables were used for determining how many infections may arise from a single infected  
359 individual and the likely age of the consequently infected individuals. Table S3 shows a  
360 complete list of parameters compiled to simulate SARS-CoV-2 transmission in our model. From  
361 these parameters, we simulated realistic disease spread in a population across settings.

### 362 *Model Description*

363 We developed a stochastic, compartmentalized, empirically driven agent-based model  
364 (ABM) to project COVID-19 cases, hospitalizations, and deaths given a variety of testing  
365 strategies. We adopted the following structure in our model: individuals in the population start as  
366 "susceptible" or "recovered" if they have previously been infected before entry into our

367simulation. Susceptible individuals can become “infected and not expressing symptoms” after a  
368positive transmission event with another infected individual. Individuals can either stay as  
369“infected and not expressing symptoms” (i.e., “asymptomatic”) for the duration of their infection  
370or move to “infected and expressing symptoms”. Infected and symptomatic individuals may  
371either recover or become hospitalized. Finally, hospitalized individuals may either recover or die  
372(see Table S3 for the probability and duration of each event). Throughout each phase, the  
373individual’s probability of transmitting the virus changes (peaking near symptom onset), as does  
374the viral load (peaking shortly after symptom onset). We inferred the viral load before symptom  
375onset based on previous studies<sup>30</sup> and drew the viral load after symptom onset from meta-  
376analyses<sup>47</sup>. Nevertheless, not all individuals will transmit the virus: in accordance with  
377“superspreading”<sup>52</sup>, we drew the number of positive contacts for infected individuals from a  
378negative binomial distribution, and whom they are likely to infect, from contact matrices.  
379Individuals interacted homogeneously with each other in Brownian fashion in an open space  
380with dimensions tuned to ensure the  $R_{\text{eff}}$  is 2.5 without any mitigation. ABMs present two  
381benefits over traditional deterministic compartmentalized models: (i) implementing individual  
382specificity is easier, and (ii) they are inherently stochastic and thus can provide credible ranges of  
383the epidemic trajectory given initial conditions. Each model was run in the following way: there  
384are 5,000 individuals with age and genders drawn from US and Indian census data, and  
385comorbidities drawn from recorded prevalences given age and gender in 2017. Note that these  
386parameters can be easily changed so that policymakers can determine which mitigation and  
387testing strategies are most effective for specific communities. We ran each model for 200 days  
388(until a steady state is reached), 200 times (i.e., independent replications), and present the 50th,  
3892.5th, 25th, 75th, and 97.5th percentiles (i.e., the “credible intervals”) as summary statistics in

390figures; when reporting values in the main text, we simply provide the 50th percentile and the  
3912.5th and 97.5th percentiles as the credible interval. We use standard methods of propagating  
392uncertainty in variables to ensure meaningful credible intervals<sup>53</sup>. Unless otherwise mentioned,  
393to test for statistically significant difference in medians between two distributions, we use a two-  
394sided paired Mood's Median test<sup>54</sup>. The model was developed in Python<sup>55</sup> using the Mesa  
395package under the Apache2 license<sup>56</sup>. All subsequent analyses were done in Python.

396

## 397REFERENCES

3981. Dong, E., Du, H. & Gardner, L. An interactive web-based dashboard to track COVID-19 in  
399 real time. *Lancet Infect. Dis.* **20**, 533–534 (2020).
4002. Wells, C. R. *et al.* Impact of international travel and border control measures on the global  
401 spread of the novel 2019 coronavirus outbreak. *Proc. Natl. Acad. Sci.* **117**, 7504–7509  
402 (2020).
4033. Brauner, J. M. *et al.* Inferring the effectiveness of government interventions against COVID-  
404 19. *Science* (2020).
4054. Chernozhukov, V., Kasahara, H. & Schrimpf, P. Causal impact of masks, policies, behavior  
406 on early Covid-19 pandemic in the US. *J. Econom.* **220**, 23–62 (2020).
4075. Chookajorn, T., Kochakarn, T., Wilasang, C., Kotanan, N. & Modchang, C. Southeast Asia  
408 is an emerging hotspot for COVID-19. *Nat. Med.* **27**, 1495–1496 (2021).
4096. Walensky, R. P., Walke, H. T. & Fauci, A. S. SARS-CoV-2 variants of concern in the United  
410 States—Challenges and opportunities. *Jama* **325**, 1037–1038 (2021).
4117. Cele, S. *et al.* SARS-CoV-2 Omicron has extensive but incomplete escape of Pfizer  
412 BNT162b2 elicited neutralization and requires ACE2 for infection. *MedRxiv* (2021).
4138. Goldberg, Y. *et al.* Waning immunity after the BNT162b2 vaccine in Israel. *N. Engl. J. Med.*  
414 **385**, e85 (2021).
4159. Brown, C. M. *et al.* Outbreak of SARS-CoV-2 infections, including COVID-19 vaccine  
416 breakthrough infections, associated with large public gatherings—Barnstable County,  
417 Massachusetts, July 2021. *Morb. Mortal. Wkly. Rep.* **70**, 1059 (2021).
41810. Lewnard, J. A. *et al.* All-cause mortality during the COVID-19 pandemic in Chennai, India:  
419 an observational study. *Lancet Infect. Dis.* (2021).

42011. Lee, E. C., Wada, N. I., Grabowski, M. K., Gurley, E. S. & Lessler, J. The engines of SARS-  
421 CoV-2 spread. *Science* **370**, 406 (2020).
42212. Smithgall, M. C., Dowlatshahi, M., Spitalnik, S. L., Hod, E. A. & Rai, A. J. Types of Assays  
423 for SARS-CoV-2 Testing: A Review. *Lab. Med.* **51**, e59–e65 (2020).
42413. Williams, E., Bond, K., Zhang, B., Putland, M. & Williamson, D. A. Saliva as a non-  
425 invasive specimen for detection of SARS-CoV-2. *J. Clin. Microbiol.* (2020).
42614. Quest Diagnostics. Quest Diagnostics Media Statement about COVID-19 Testing. (2020).
42715. Zhen, W., Smith, E., Manji, R., Schron, D. & Berry, G. J. Clinical evaluation of three  
428 sample-to-answer platforms for detection of SARS-CoV-2. *J. Clin. Microbiol.* **58**, (2020).
42916. Hirotsu, Y. *et al.* Comparison of automated SARS-CoV-2 antigen test for COVID-19  
430 infection with quantitative RT-PCR using 313 nasopharyngeal swabs, including from seven  
431 serially followed patients. *Int. J. Infect. Dis.* **99**, 397–402 (2020).
43217. Chowdhury, R. *et al.* Dynamic interventions to control COVID-19 pandemic: a multivariate  
433 prediction modelling study comparing 16 worldwide countries. *Eur. J. Epidemiol.* **35**, 389–  
434 399 (2020).
43518. Laxminarayan, R. *et al.* Epidemiology and transmission dynamics of COVID-19 in two  
436 Indian states. *Science* **370**, 691–697 (2020).
43719. Peters, D. H. *et al.* Poverty and access to health care in developing countries. *Ann. N. Y.*  
438 *Acad. Sci.* **1136**, 161–171 (2008).
43920. Asgary, A., Cojocaru, M. G., Najafabadi, M. M. & Wu, J. Simulating preventative testing of  
440 SARS-CoV-2 in schools: policy implications. *BMC Public Health* **21**, 1–18 (2021).
44121. Wilder, B. *et al.* Modeling between-population variation in COVID-19 dynamics in Hubei,  
442 Lombardy, and New York City. *Proc. Natl. Acad. Sci.* **117**, 25904–25910 (2020).

44322. Hoertel, N. *et al.* A stochastic agent-based model of the SARS-CoV-2 epidemic in France.  
444 *Nat. Med.* **26**, 1417–1421 (2020).
44523. Moghadas, S. M. *et al.* Projecting hospital utilization during the COVID-19 outbreaks in the  
446 United States. *Proc. Natl. Acad. Sci.* **117**, 9122–9126 (2020).
44724. Kucharski, A. J. *et al.* Effectiveness of isolation, testing, contact tracing, and physical  
448 distancing on reducing transmission of SARS-CoV-2 in different settings: a mathematical  
449 modelling study. *Lancet Infect. Dis.* **20**, 1151–1160 (2020).
45025. Walker, P. G. *et al.* The impact of COVID-19 and strategies for mitigation and suppression  
451 in low-and middle-income countries. *Science* **369**, 413–422 (2020).
45226. CDC. COVID-19 Cases, Deaths, and Trends in the US | CDC COVID Data Tracker. *Centers  
453 for Disease Control and Prevention* <https://covid.cdc.gov/covid-data-tracker> (2020).
45427. Bubar, K. M. *et al.* Model-informed COVID-19 vaccine prioritization strategies by age and  
455 serostatus. *Science* (2021).
45628. Pavelka, M. *et al.* The impact of population-wide rapid antigen testing on SARS-CoV-2  
457 prevalence in Slovakia. *Science* **372**, 635–641 (2021).
45829. Boum, Y. *et al.* Performance and operational feasibility of antigen and antibody rapid  
459 diagnostic tests for COVID-19 in symptomatic and asymptomatic patients in Cameroon: a  
460 clinical, prospective, diagnostic accuracy study. *Lancet Infect. Dis.* (2021).
46130. Larremore, D. B. *et al.* Test sensitivity is secondary to frequency and turnaround time for  
462 COVID-19 screening. *Sci. Adv.* eabd5393 (2020).
46331. Worobey, M. *et al.* The emergence of SARS-CoV-2 in Europe and North America. *Science*  
464 **370**, 564–570 (2020).

46532. He, X. *et al.* Temporal dynamics in viral shedding and transmissibility of COVID-19. *Nat.*  
466 *Med.* **26**, 672–675 (2020).
46733. Monod, M. *et al.* Age groups that sustain resurging COVID-19 epidemics in the United  
468 States. *Science* **371**, (2021).
46934. Pei, S., Kandula, S. & Shaman, J. Differential effects of intervention timing on COVID-19  
470 spread in the United States. *Sci. Adv.* **6**, eabd6370 (2020).
47135. Endo, A., Abbott, S., Kucharski, A. J. & Funk, S. Estimating the overdispersion in COVID-  
472 19 transmission using outbreak sizes outside China. *Wellcome Open Res.* **5**, 67 (2020).
47336. Thiagarajan, K. Why is India having a covid-19 surge? (2021).
47437. Walensky, R. P., Walke, H. T. & Fauci, A. S. SARS-CoV-2 variants of concern in the United  
475 States—Challenges and opportunities. *JAMA* **325**, 1037–1038 (2021).
47638. Mossong, J. *et al.* Social contacts and mixing patterns relevant to the spread of infectious  
477 diseases. *PLoS Med* **5**, e74 (2008).
47839. Verelst, F., Willem, L. & Beutels, P. Behavioural change models for infectious disease  
479 transmission: a systematic review (2010–2015). *J. R. Soc. Interface* **13**, 20160820 (2016).
48040. Reid, A. E., Cialdini, R. B. & Aiken, L. S. Social norms and health behavior. in *Handbook of*  
481 *behavioral medicine* 263–274 (Springer, 2010).
48241. Christakis, N. A. & Fowler, J. H. The spread of obesity in a large social network over 32  
483 years. *N. Engl. J. Med.* **357**, 370–379 (2007).
48442. Barman, M. P., Rahman, T., Bora, K. & Borgohain, C. COVID-19 pandemic and its  
485 recovery time of patients in India: A pilot study. *Diabetes Metab. Syndr. Clin. Res. Rev.* **14**,  
486 1205–1211 (2020).

48743. James, S. L. *et al.* Global, regional, and national incidence, prevalence, and years lived with  
488 disability for 354 diseases and injuries for 195 countries and territories, 1990–2017: a  
489 systematic analysis for the Global Burden of Disease Study 2017. *The Lancet* **392**, 1789–  
490 1858 (2018).
49144. CDC. Healthcare Workers. *Centers for Disease Control and Prevention*  
492 <https://www.cdc.gov/coronavirus/2019-ncov/hcp/planning-scenarios.html> (2020).
49345. Carter, E. M. & Potts, H. W. Predicting length of stay from an electronic patient record  
494 system: a primary total knee replacement example. *BMC Med. Inform. Decis. Mak.* **14**, 26  
495 (2014).
49646. McAloon, C. *et al.* Incubation period of COVID-19: a rapid systematic review and meta-  
497 analysis of observational research. *BMJ Open* **10**, e039652 (2020).
49847. Weiss, A., Jellingsø, M. & Sommer, M. O. A. Spatial and temporal dynamics of SARS-CoV-  
499 2 in COVID-19 patients: A systematic review and meta-analysis. *EBioMedicine* **58**, 102916  
500 (2020).
50148. Cevik, M. *et al.* SARS-CoV-2, SARS-CoV, and MERS-CoV viral load dynamics, duration  
502 of viral shedding, and infectiousness: a systematic review and meta-analysis. *Lancet Microbe*  
503 **2**, e13–e22 (2021).
50449. Benefield, A. E. *et al.* SARS-CoV-2 viral load peaks prior to symptom onset: a systematic  
505 review and individual-pooled analysis of coronavirus viral load from 66 studies. *medRxiv*  
506 2020.09.28.20202028 (2020) doi:10.1101/2020.09.28.20202028.
50750. Chandrashekar, A. *et al.* SARS-CoV-2 infection protects against rechallenge in rhesus  
508 macaques. *Science* **369**, 812–817 (2020).



50951. Mistry, D. *et al.* Inferring high-resolution human mixing patterns for disease modeling. *Nat.*

510 *Commun.* **12**, 1–12 (2021).

51152. Lloyd-Smith, J. O., Schreiber, S. J., Kopp, P. E. & Getz, W. M. Superspreading and the

512 effect of individual variation on disease emergence. *Nature* **438**, 355–359 (2005).

51353. Taylor, J. *Introduction to error analysis, the study of uncertainties in physical measurements.*

514 (1997).

51554. Mood, A. M. On the asymptotic efficiency of certain nonparametric two-sample tests. *Ann.*

516 *Math. Stat.* 514–522 (1954).

51755. Van Rossum, G. Python Programming Language. in vol. 41 36 (2007).

51856. Masad, D. & Kazil, J. MESA: an agent-based modeling framework. in 53–60 (Citeseer,

519 2015).

520

521

522

## 523 **ACKNOWLEDGEMENTS**

524 The authors are grateful for the computational resources managed and supported by Princeton

525 Research Computing, which were used for all simulations in this paper. This work was supported

526 by the Foundation for Innovative New Diagnostics.

## 527 **AUTHOR CONTRIBUTIONS**

528 R.L. conceived the study. C.K. and R.B. developed the models and performed the analyses. R.L.,

529 S.O., and S.C. provided validation of study findings. C.K. and R.B. prepared the first draft of the

530 manuscript; all authors contributed to the revised manuscript.

## 531 **COMPETING INTERESTS**

532 The authors declare no potential competing interests.

## 533 **DATA AVAILABILITY**

534 All data used in this paper is freely and publicly accessible through the US Center for Disease

535 Control or peer-reviewed studies. The provided supplement details data sources.

## 536 **CODE AVAILABILITY**

537 The code used in this paper is available upon request and is on [GitHub](#).

538

## 539 **FIGURES**

**(A) United States**

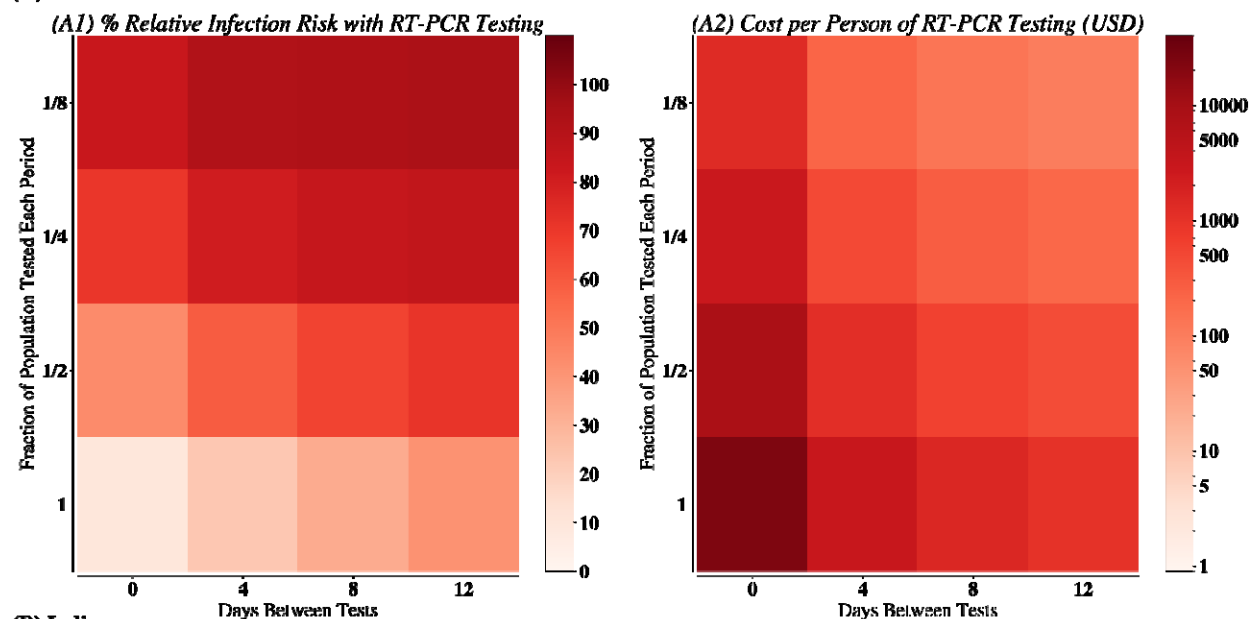

**(B) India**

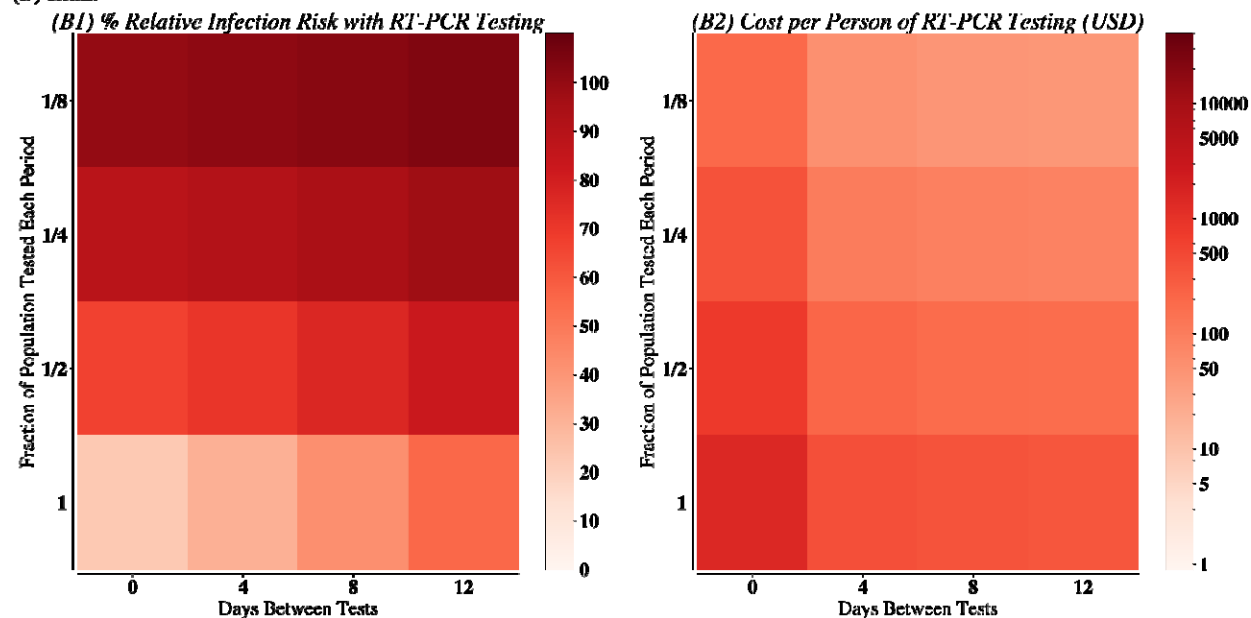

Figure 1: Relative infection risk and cost of testing for various RT-PCR scenarios in (A) United States and (B) India. (1) describes the relative infection risk of RT-PCR tests being used at the given frequency and coverage, compared with the scenario with no mitigation. (2) describes the cost of that testing scenario assuming that all susceptible individuals are tested at the appropriate frequency and coverage.

**(A) United States**

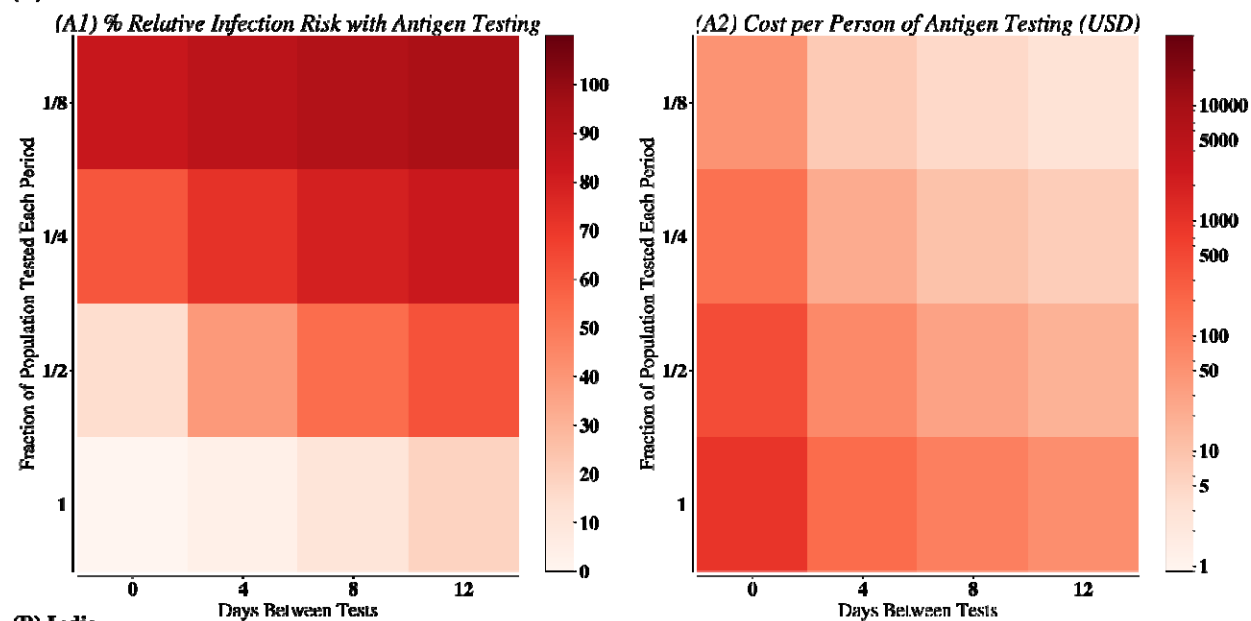

**(B) India**

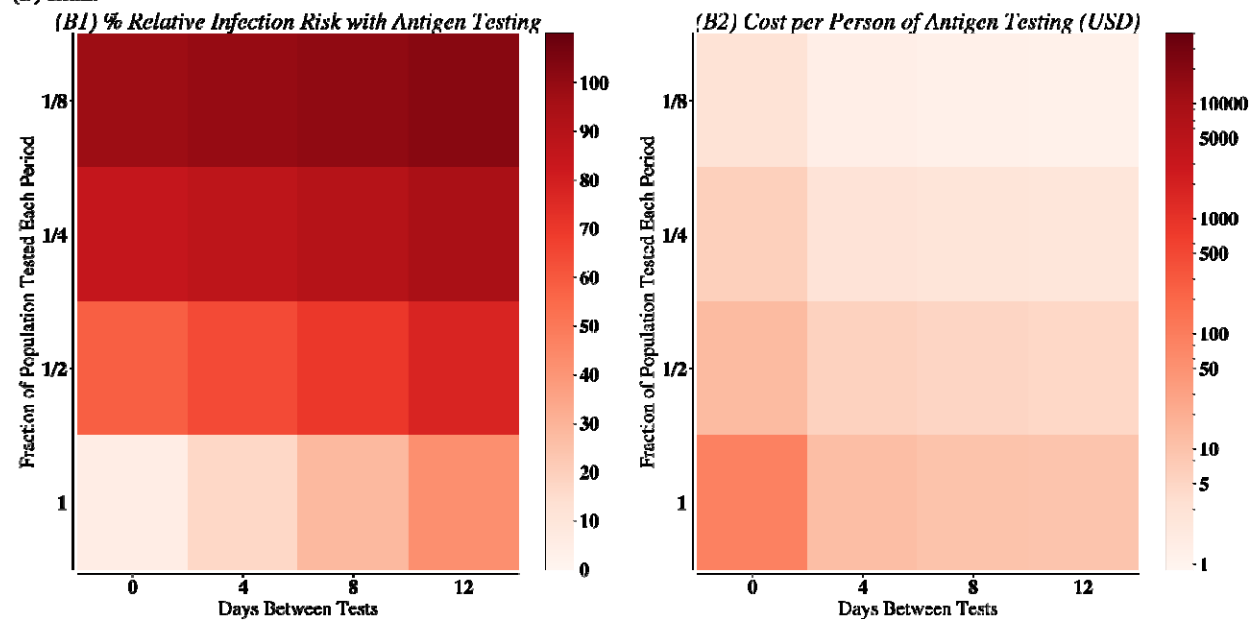

Figure 2: Relative infection risk and cost of testing for various antigen scenarios in (A) United States and (B) India. (1) describes the relative infection risk of antigen tests being used at the given frequency and coverage, compared with the scenario with no mitigation. (2) describes the cost of that testing scenario assuming that all susceptible individuals are tested at the appropriate frequency and coverage.

542  
543  
544  
545  
546  
547  
548  
549  
550

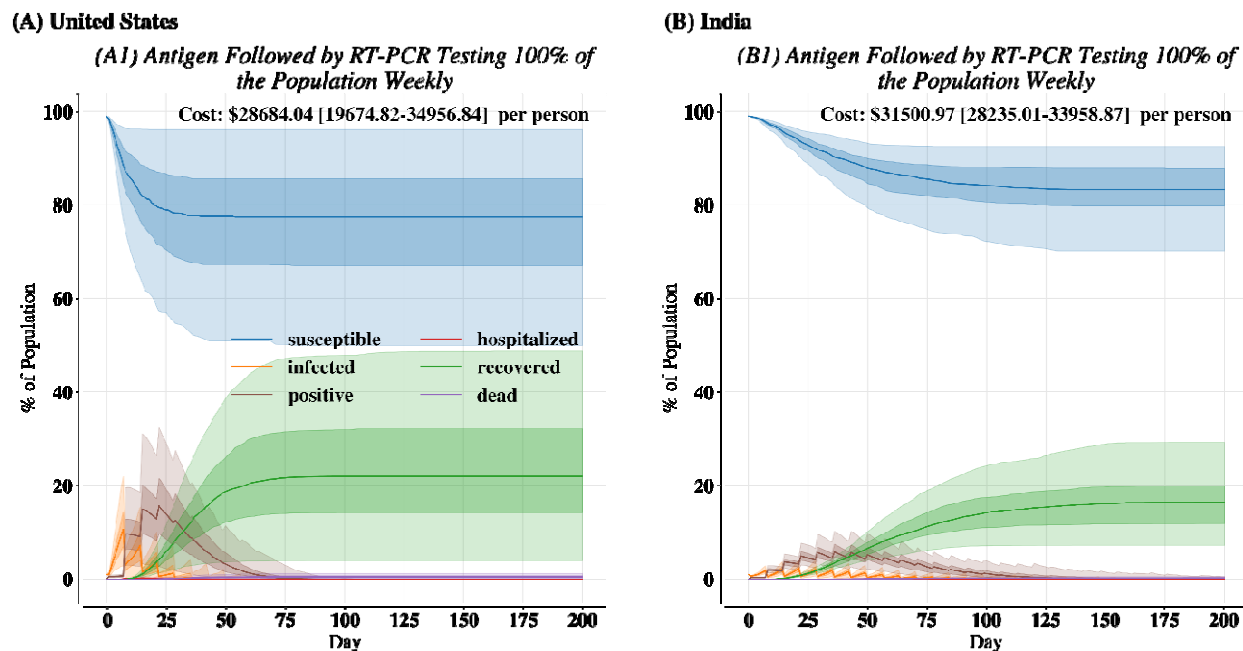

Figure 3: Disease course in (A) United States and (B) India for antigen testing followed by RT-PCR testing of antigen-negative individuals 100% of the population weekly. Bold lines are the median over 200 independent replicates. Dark-shaded regions are the 25<sup>th</sup> to 75<sup>th</sup> percentiles. Light-shaded regions are 2.5<sup>th</sup> to 97.5<sup>th</sup> percentiles.

551  
552  
553  
554  
555  
556  
557  
558  
559  
560  
561  
562

**(A) United States**

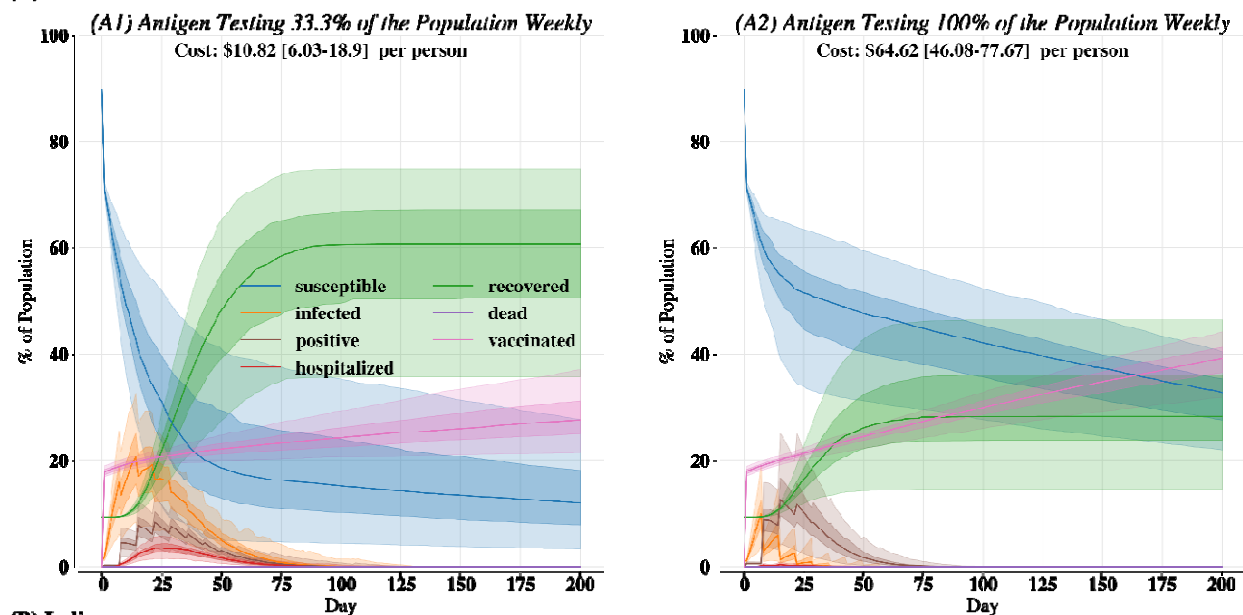

**(B) India**

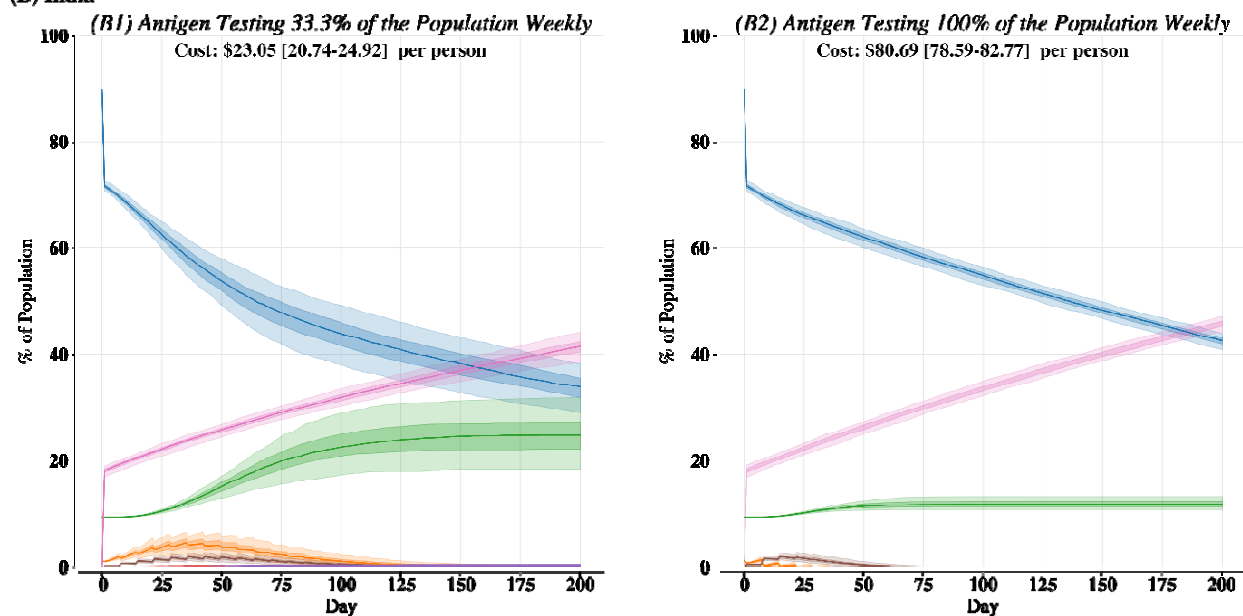

Figure 4: Disease course for (A) United States and (B) India with 20% of the population as initially vaccinated and then 0.25% of the susceptible population being vaccinated each subsequent day; vaccines are coupled with antigen testing (1) 33.3% or (2) 100% of the population weekly. Bold lines are the median over 200 independent replicates. Dark-shaded regions are the 25<sup>th</sup> to 75<sup>th</sup> percentiles. Light-shaded regions are 2.5<sup>th</sup> to 97.5<sup>th</sup> percentiles.
